# Supplementary material
Source: HighWire-hosted journal article supplement (http://www.annfammed.org/highwire/filestream/8519/field_highwire_adjunct_files/12/Goldman_Supp_App_8.pdf)
Supplement: Goldman_Supp_App_8.pdf [file Goldman_Supp_App_8.pdf]

**Goldman R, Parker DR, Brown J, Walker J, Eaton CB, Borkan JM. Recommendations for a Mixed Methods Approach for Evaluating the Patient-Centered Medical Home. *Ann Fam Med.* 2015;13(2):.**

**Supplemental Appendix 8. Brown Patient Pathway Observation Grid**

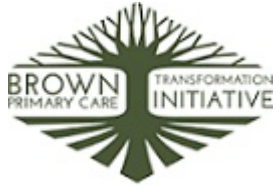

## Brown Primary Care Transformation Initiative Patient Path Observation Grid

**Patient Study ID Number:** \_\_\_\_\_  
**Patient Age:** \_\_\_\_\_ **Patient support person:** \_\_\_\_\_  
**Patient Sex:** \_\_\_\_\_

**Site:** \_\_\_\_\_  
**Date:** \_\_\_\_\_  
**Observer's name:** \_\_\_\_\_

|                                                               | <b>Time</b>                            | <b>Place</b> | <b>Observations of elements related to team based care, efficiency, redundancy, confidentiality, tone/nature of provider/staff interactions and interactions with patients, patient's behavior/demeanor/engagement in care, etc.)</b> | <b>Insights</b> |
|---------------------------------------------------------------|----------------------------------------|--------------|---------------------------------------------------------------------------------------------------------------------------------------------------------------------------------------------------------------------------------------|-----------------|
| <b>Check-in</b>                                               | <i>start time:</i><br><i>end time:</i> |              |                                                                                                                                                                                                                                       |                 |
| <b>Waiting Room</b>                                           | <i>start time:</i><br><i>end time:</i> |              |                                                                                                                                                                                                                                       |                 |
| <b>MA or other clinical staff:</b><br>_____<br>_____<br>_____ | <i>start time:</i><br><i>end time:</i> |              |                                                                                                                                                                                                                                       |                 |

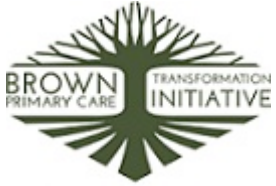

## Brown Primary Care Transformation Initiative Patient Path Observation Grid

**Patient Study ID Number:** \_\_\_\_\_  
**Patient Age:** \_\_\_\_\_ **Patient support person:** \_\_\_\_\_  
**Patient Sex:** \_\_\_\_\_

**Site:** \_\_\_\_\_  
**Date:** \_\_\_\_\_  
**Observer's name:** \_\_\_\_\_

|                                        |                                        |  |  |  |
|----------------------------------------|----------------------------------------|--|--|--|
| <b>MD (or other provider)</b><br>_____ | <i>start time:</i><br><i>end time:</i> |  |  |  |
| <b>Other Processes Observed</b>        |                                        |  |  |  |
| <b>Check-out</b>                       | <i>start time:</i><br><i>end time:</i> |  |  |  |

**At end of each patient pathway observation ask:**

1. Do you think you said or did anything differently *because I was with you* today? \_\_\_\_\_ [If yes] How so?
2. Do you think you said or did anything differently *because of anything we discussed* today? \_\_\_\_\_ [If yes] How so?
